# Supplementary material for: Effects of Preconception Care and Periconception Interventions on Maternal Nutritional Status and Birth Outcomes in Low- and Middle-Income Countries: A Systematic Review
Source: PubMed Central journal article supplement (PMC7146400; doi:10.3390/nu12030606), 2020-02-26
Supplement: nutrients-12-00606-s001.pdf [file nutrients-12-00606-s001.pdf]

Supplementary Table 1: Location the interventions were conducted, by intervention type

| Location of intervention               | Africa                                                                                                          | Asia                                      | South America | Central America  | North America |
|----------------------------------------|-----------------------------------------------------------------------------------------------------------------|-------------------------------------------|---------------|------------------|---------------|
| <b>Delaying Pregnancy</b>              | Cameroon<br>Ethiopia<br>Kenya<br>Malawi<br>Nigeria<br>Senegal<br>South Africa<br>Tanzania<br>Uganda<br>Zimbabwe | China<br>India<br>Vietnam                 | Chile         | Mexico<br>Belize |               |
| <b>Inter-pregnancy Intervals</b>       |                                                                                                                 | Bangladesh<br>China<br>India              |               |                  |               |
| <b>Folic Acid Supplementation</b>      |                                                                                                                 | China                                     |               | Cuba<br>Brazil   | Honduras      |
| <b>Iron-folic Acid Supplementation</b> | Mali<br>Tanzania                                                                                                | Bangladesh<br>India<br>Indonesia<br>Nepal |               |                  |               |
